# Supplementary material for: What Solutions Exist for Developmental Delays Facing Indigenous Children Globally? A Co-Designed Systematic Review
Source: MDPI journal article supplement (doi:10.3390/children7120285), 2020-12-10
Supplement: s1 [file s1]

**Table S1.** Search strategy.

| <b>Search</b> | <b>Query</b>                                                                                                                                                                                           |
|---------------|--------------------------------------------------------------------------------------------------------------------------------------------------------------------------------------------------------|
| #1            | Oceanic ancestry group OR Indigenous groups OR Aboriginal OR First Nation people OR Sami OR Indian OR American Native OR African ancestry group OR European ancestry group                             |
| #2            | Preschool-aged children                                                                                                                                                                                |
| #3            | Neurological delay OR Developmental delay OR socio-emotional regulation OR stress disorder OR social competence OR hyperarousal OR language delay OR emotional trauma OR Posttraumatic stress disorder |
| #4            | Therapeutics OR early intervention OR solution OR service OR program                                                                                                                                   |
| #5            | #1 AND #2 AND #3 AND #4                                                                                                                                                                                |
|               | .mp. [mp=title, abstract, heading word, table of contents, key concepts, original title, tests & measures]                                                                                             |

**Table S2: Critical Appraisal Skills Program (CASP) Assessment**

| <b>CASP Appraisal</b>                         | <b>Articles</b> |                |                                  |                                  |                 |                                  |                 |
|-----------------------------------------------|-----------------|----------------|----------------------------------|----------------------------------|-----------------|----------------------------------|-----------------|
| Yes, Unsure, No                               | <b>Big Foot</b> | <b>De Rios</b> | <b>Fazel</b>                     | <b>Kellam</b>                    | <b>Morsette</b> | <b>Spencer</b>                   | <b>Vazir</b>    |
| 1. Clear Aims Statement                       | N               | N              | Y                                | Y                                | Y               | Y                                | Y               |
| 2. Appropriate Qualitative methodology        | N               | N              | N, Quantitative, but appropriate | N, Quantitative, but appropriate | N, Quantitative | N, Quantitative, but appropriate | N, Quantitative |
| 3. Research design appropriate                | Y               | Y              | Y                                | Y                                | N               | Y                                | Y               |
| 4. Recruitment strategy                       | N/A             | N/A            | Y                                | Y                                | Y               | Y                                | Y               |
| 5. Data collection appropriate                | N/A             | N/A            | Y                                | Y                                | Y               | Y                                | Y               |
| 6. Researchers and participants distinguished | N/A             | N/A            | N                                | Y                                | Cant tell       | N                                | Y               |
| 7. Ethical issues                             | N/A             | N/A            | N                                | N                                | Cant tell       | N                                | N               |
| 8. Rigorous Data analysis                     | N/A             | N/A            | Y                                | Y                                | Y               | Y                                | Y               |
| 9. Clear statement of findings                | N/A             | N/A            | Y                                | Y                                | Y               | Y                                | Y               |
| 10. How valuable is the research              | Y               | Y              | Y                                | Y                                | Y               | Y                                | Y               |

N: No, Y: Yes, N/A: Not/Applicable
